# Supplementary material for: Plant Poly(ADP-Ribose) Polymerase 1 Is a Potential Mediator of Cross-Talk between the Cajal Body Protein Coilin and Salicylic Acid-Mediated Antiviral Defence
Source: MDPI journal article supplement (doi:10.3390/v15061282), 2023-05-30
Supplement: s1 [file s1]

Table S1. Primers used for quantitative RT-PCR

| <b>Primer</b>            | <b>5'-3' sequence</b>                                 | <b>Reference</b>      | <b>Primer concentration (nM)</b> | <b>E (%)</b> |
|--------------------------|-------------------------------------------------------|-----------------------|----------------------------------|--------------|
| NbUBI3-F<br>NbUBI3-R     | AATGTGAAAGCCAAGATCCAAG<br>CGGAGGCGGAGCACGAGATGAA      | GenBank<br>TC20187    | 300                              | 91.2         |
| NbL23-F<br>NbL23-R       | AAGGATGCCGTGAAGAAGATGT<br>GCATCGTAGTCAGGAGTCAACC      | GenBank<br>TC19271    | 350                              | 97           |
| TRV RNA1-F<br>TRV RNA1-R | CAGTCTATACACAGAAACAGA<br>GACGTGTGTACTCAAGGGTT         | GenBank<br>AF406990.1 | 350                              | 94           |
| NbPR-1a-F<br>NbPR-1a-R   | CCGTTGAGATGTGGGTCAAT<br>CGCCAAACCACCTGAGTATAG         | GenBank<br>JN247448.1 | 350                              | 98           |
| NbPARP1-F<br>Nb PARP1-R  | AACTGGAGGCACAGACTAAAGCCT<br>ACTGAGATAGCCCATTAGCAGCCTG | GenBank<br>KP771975   | 340                              | 97           |
